# Supplementary material
Source: HighWire-hosted journal article supplement (http://thorax.bmj.com/highwire/filestream/174659/field_highwire_adjunct_files/0/thorax_59_1.pdf)
Supplement: thorax_59_1.pdf [file thorax_59_1.pdf]

Chronic Obstructive Pulmonary Disease. National clinical guideline on management of chronic obstructive pulmonary disease in adults in primary and secondary care. *Thorax* 2004 Mar; 59(Suppl 1): 1-232.

This has been superseded By NICE Guideline Chronic Obstructive Pulmonary Disease CG101, available at <http://guidance.nice.org.uk/CG101>
